# Supplementary material for: A novel highly sensitive dual-channel chemical sensor for sequential recognition of Cu2+and CN−in aqueous media and its bioimaging applications in living cells
Source: Royal Society of Chemistry journal article supplement (doi:10.1039/d1nj03548g), 2021-01-01
Supplement: d1nj03548g1.pdf [file d1nj03548g1.pdf]

# Electronic Supplementary Material

## A Novel High-sensitive Dual-channel Chemical Sensor for Sequential Recognition of $\text{Cu}^{2+}/\text{CN}^-$ in Aqueous Media and its Bioimaging Applications on Living Cells

Yong-Qiang Xie<sup>a, c</sup>, You-Ming Zhang<sup>a, b, \*</sup>, Zhao-Hui Li<sup>a</sup>, Xiao-Ni Qi<sup>a</sup>, Hong Yao<sup>a</sup>, Bing-Bing Shi<sup>a</sup>, Wen-Juan Qu<sup>a</sup>, Tai-Bao Wei<sup>a\*</sup> and Qi Lin<sup>a, \*</sup>

<sup>a</sup> Key Laboratory of Eco-Environment-Related Polymer Materials, Ministry of Education of China, Key Laboratory of Polymer Materials of Gansu Province, College of Chemistry and Chemical Engineering, Northwest Normal University, Lanzhou, Gansu, 730070, P. R. China;

<sup>b</sup> Gansu Natural Energy Research Institute, Lanzhou, 730046, P. R. China;

<sup>c</sup> Experimental & Training Teaching Centers, Gansu University of Chinese Medicine Lanzhou, Gansu, 730000, P. R. China.

---

\*Corresponding author: Tel: +86-931-7973120;

Email: [zhangnwnu@126.com](mailto:zhangnwnu@126.com)(You-Ming Zhang); [weitaobao@126.com](mailto:weitaobao@126.com) (Tai-Bao Wei);

[linqi2004@126.com](mailto:linqi2004@126.com) (Qi Lin)

## Contents

|                                                                                                                                                                                                        |    |
|--------------------------------------------------------------------------------------------------------------------------------------------------------------------------------------------------------|----|
| 1. Absorbance spectra of <b>DH</b> with increasing concentrations of $\text{Cu}^{2+}$ .....                                                                                                            | 3  |
| 2. The UV-vis detection limit of $\text{Cu}^{2+}$ determined by <b>DH</b> .....                                                                                                                        | 4  |
| 3. The fluorescent detection limit of $\text{Cu}^{2+}$ determined by <b>DH</b> .....                                                                                                                   | 5  |
| 4. Effect of pH on the sensing properties of <b>DH</b> .....                                                                                                                                           | 6  |
| 5. Effect of response time on the fluorescence intensity of <b>DH-Cu<sup>2+</sup></b> .....                                                                                                            | 7  |
| 6. The fluorescent detection limit of $\text{CN}^-$ determined by <b>DH- Cu<sup>2+</sup></b> .....                                                                                                     | 8  |
| 9. The Job's plot examined between $\text{Cu}^{2+}$ and <b>DH</b> .....                                                                                                                                | 11 |
| 10. FT-IR spectra of sensor <b>DH</b> , <b>DH- Cu<sup>2+</sup></b> and <b>DH- Cu<sup>2+</sup>-CN<sup>-</sup></b> .....                                                                                 | 12 |
| 11. ESI/MS of sensor <b>DH</b> and after adding $\text{Cu}^{2+}$ ions .....                                                                                                                            | 13 |
| 12. ESI/MS of <b>DH-Cu<sup>2+</sup></b> after adding $\text{CN}^-$ .....                                                                                                                               | 14 |
| 13. <sup>1</sup> H-NMR spectrum of <b>DH</b> .....                                                                                                                                                     | 15 |
| 14. The simulated absorption spectrum of the probe molecules <b>DH</b> and <b>DH-Cu<sup>2+</sup></b> and the absorption spectrum obtained from experiments .....                                       | 16 |
| 15. The simulated emission spectrum of the probe molecules <b>DH</b> , <b>DH-Cu<sup>2+</sup></b> , <b>DH- Cu<sup>2+</sup>-CN<sup>-</sup></b> and the emission spectrum obtained from experiments ..... | 17 |
| 16. Reversible switching cycles of fluorescence intensity by alternate addition of $\text{Cu}^{2+}$ and EDTA .....                                                                                     | 18 |
| 17. Cytotoxicity test of sensor <b>DH</b> .....                                                                                                                                                        | 19 |

1. Absorbance spectra of **DH** with increasing concentrations of  $\text{Cu}^{2+}$

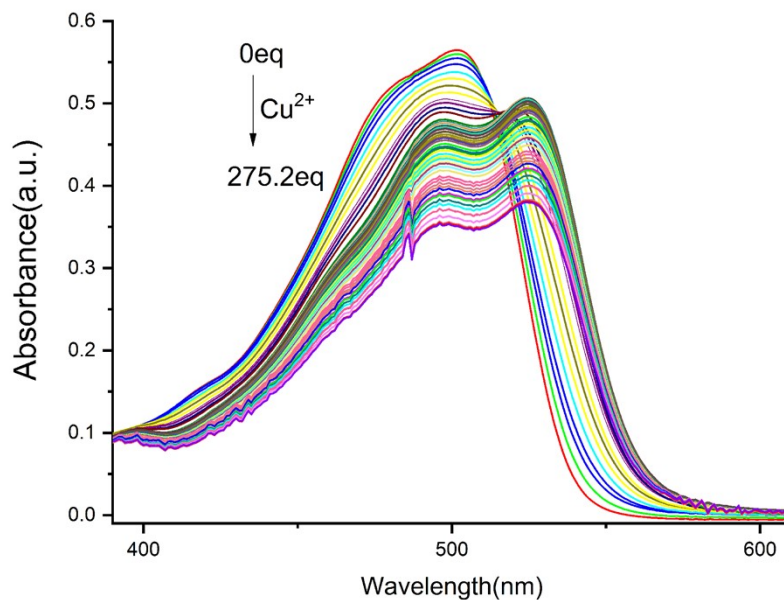

**Fig. S1** Absorbance spectra of **DH** ( $2.0 \times 10^{-5}$  M) with increasing concentrations of  $\text{Cu}^{2+}$ , in DMSO/H<sub>2</sub>O (9 : 1, v/v) solutions at room temperature.

## 2. The UV-vis detection limit of Cu<sup>2+</sup> determined by DH

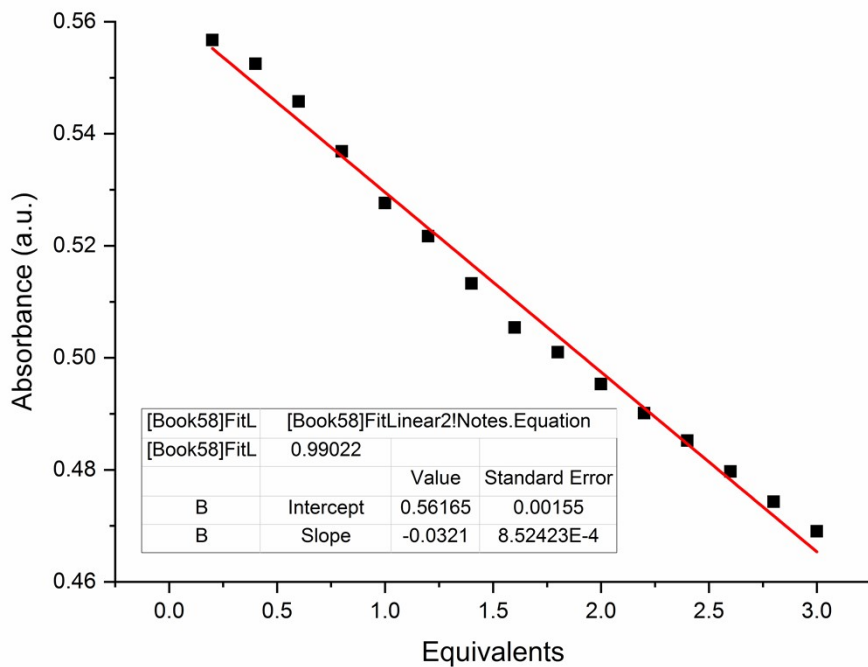

Linear Equation:  $Y = -0.0321 \times X + 0.56165$        $R = 0.9902$

$$S = 3.21 \times 10^4 \quad \delta = \sqrt{\frac{\sum(A - \bar{A})^2}{(N - 1)}} = 2.884 \times 10^{-2} \quad (N = 15) \quad K = 3$$

$$\text{LOD} = K \times \delta / S = 2.7105 \times 10^{-6} \text{ M}$$

**Fig. S2** The photograph of the UV-vis absorption spectral linear range for Cu<sup>2+</sup>.

### 3. The fluorescent detection limit of Cu<sup>2+</sup> determined by DH

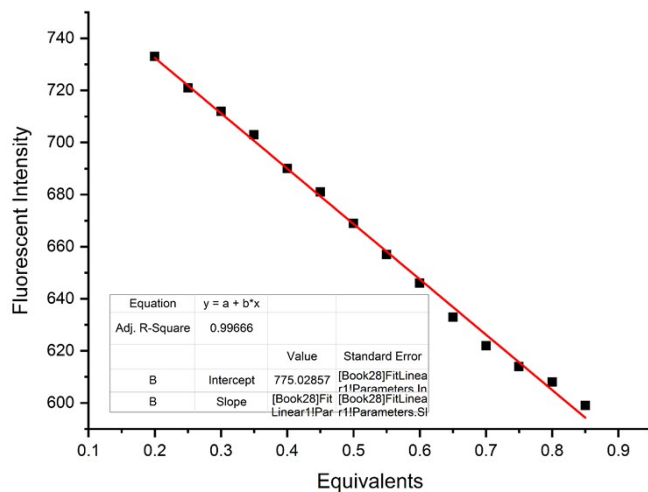

Linear Equation:  $Y = -212.5714 \times X + 775.02857$        $R = 0.9966$

$$S = 2.225 \times 10^8 \quad \delta = \sqrt{\frac{\sum(F - \bar{F})^2}{(N - 1)}} = 49.93 \quad (N = 15) \quad K = 3$$

$$\text{LOD} = K \times \delta / S = 7.048 \times 10^{-7} \text{ M}$$

**Fig. S3** The photograph of the fluorescent spectrum linear range for Cu<sup>2+</sup>.

#### 4. Effect of pH on the sensing properties of DH

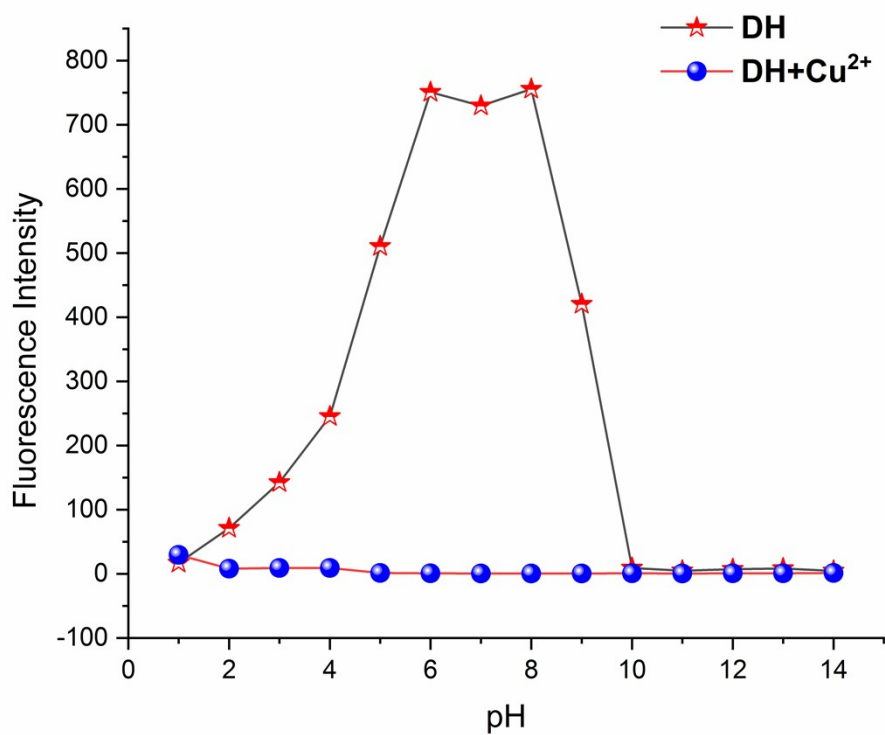

Fig. S4 Effect of pH on the sensing properties of DH in the absence and presence of Cu<sup>2+</sup>

5. Effect of response time on the fluorescence intensity of  $\text{DH-Cu}^{2+}$

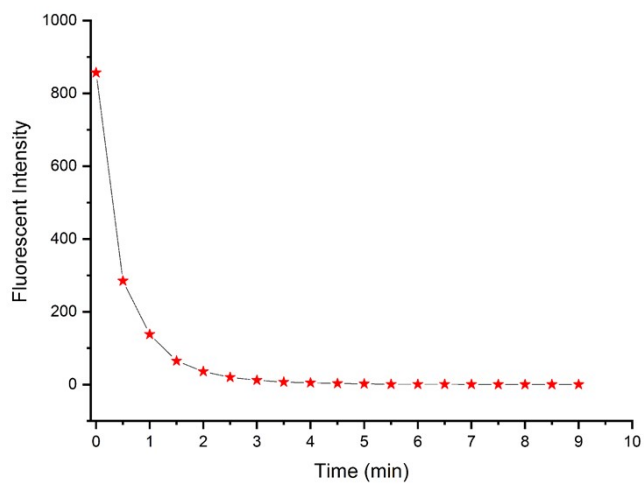

**Fig. S5** Effect of response time on the fluorescence intensity of  $\text{DH-Cu}^{2+}$

6. The fluorescent detection limit of  $\text{CN}^-$  determined by  $\text{DH} + \text{Cu}^{2+}$

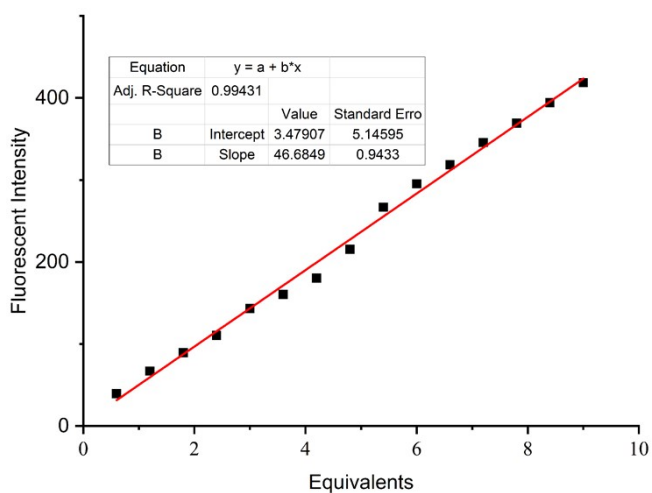

Linear Equation:  $Y = 46.685 \times X + 3.47907$        $R = 0.99431$

$$S = 4.6685 \times 10^7 \quad \delta = \sqrt{\frac{\sum(F - \bar{F})^2}{(N - 1)}} = 0.0420 \quad (N = 15) \quad K = 3$$

$$\text{LOD} = K \times \delta / S = 8.1067 \times 10^{-6} \text{ M}$$

**Fig. S6** The photograph of the fluorescent spectrum linear range for  $\text{CN}^-$ .



## 7. Fluorescence spectra of **DH** with increasing concentrations of $\text{CN}^-$

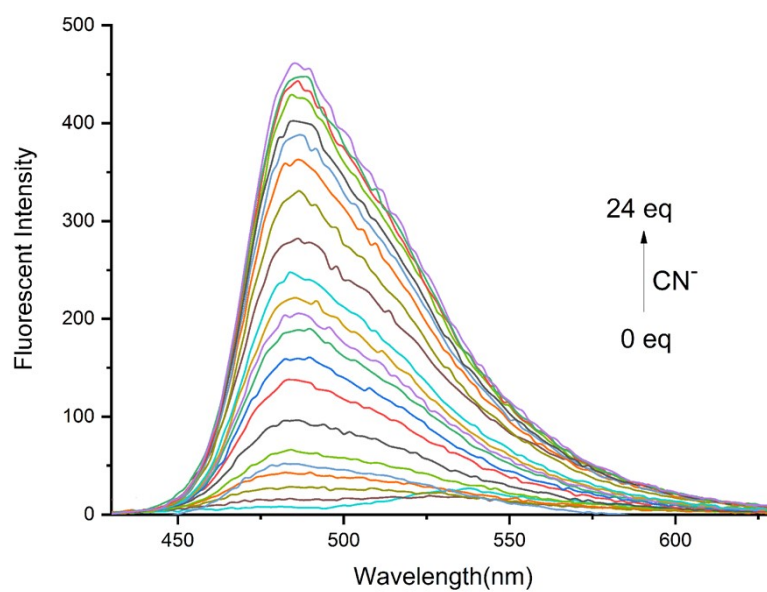

Fig.S7 Fluorescence spectra of **DH** ( $2.0 \times 10^{-5}$ ) with increasing concentrations of  $\text{CN}^-$ , in DMSO/ $\text{H}_2\text{O}$  (9 : 1, v/v) solutions at room temperature ( $\lambda_{\text{ex}}=415$  nm).

## 8. The fluorescent detection limit of $\text{CN}^-$ determined by DH

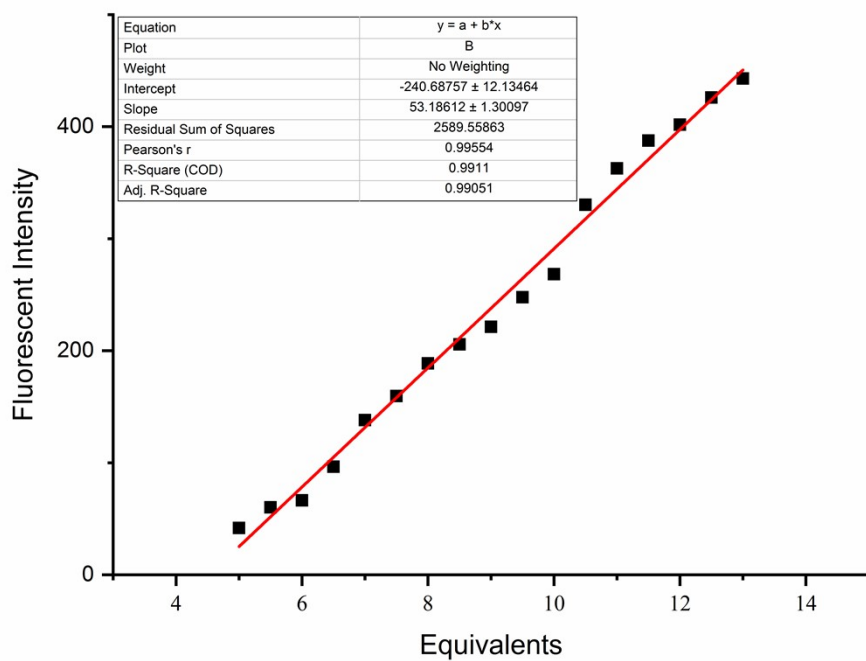

Linear Equation:  $Y = 53.1861 \times X + 240.6876$        $R = 0.99051$

$$S = 5.3186 \times 10^7 \quad \delta = \sqrt{\frac{\sum(F - \bar{F})^2}{(N - 1)}} = 134.8896 \quad (N = 17) \quad K = 3$$

$$\text{LOD} = K \times \delta / S = 7.6085 \times 10^{-6} \text{ M}$$

**Fig. S8** The photograph of the fluorescent spectrum linear range for  $\text{CN}^-$ .

## 9. The Job's plot examined between $\text{Cu}^{2+}$ and **DH**

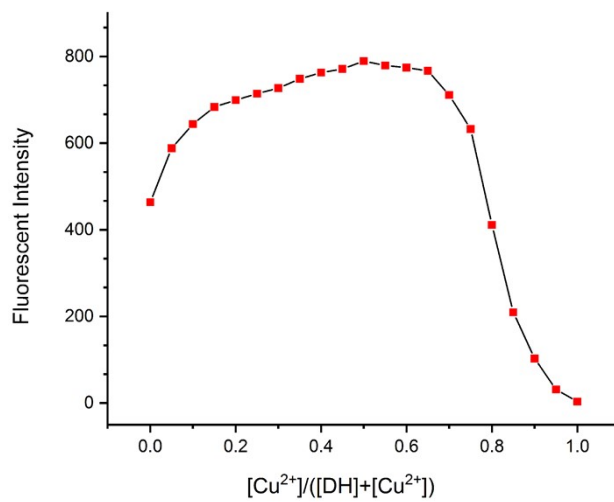

**Fig. S9** The Job's plot examined between  $\text{Cu}^{2+}$  and **DH**, indicating the 1 : 2 stoichiometry for **DH** and  $\text{Cu}^{2+}$ .

10. FT-IR spectra of sensor DH, DH- Cu<sup>2+</sup> and DH- Cu<sup>2+</sup>-CN<sup>-</sup>

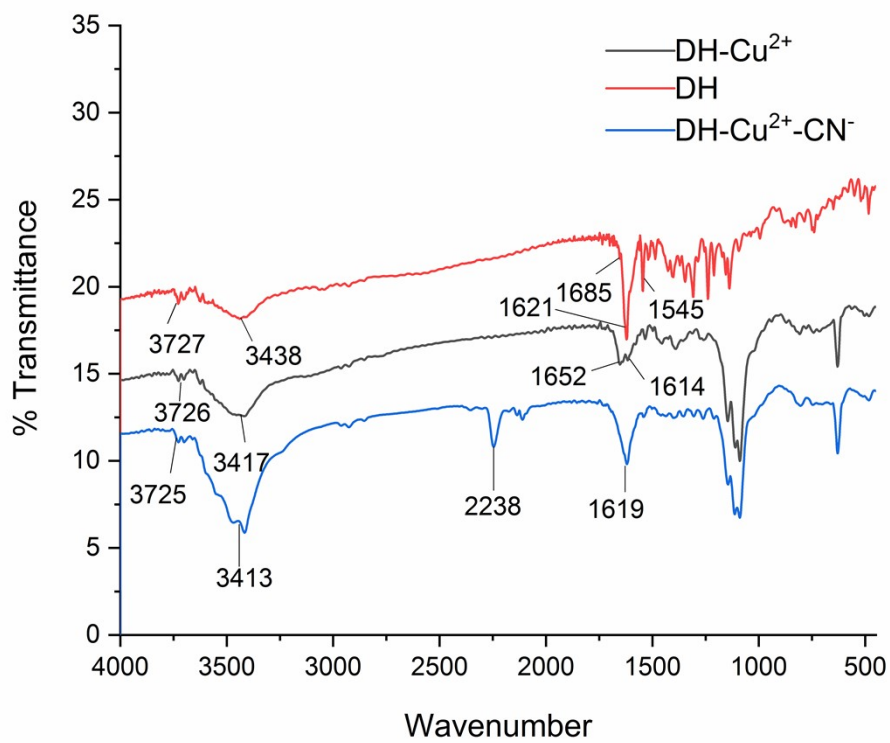

Fig. S10 FT-IR spectra of sensor DH, DH- Cu<sup>2+</sup> and DH- Cu<sup>2+</sup>-CN<sup>-</sup>.

### 11.ESI/MS of sensor **DH** and after adding $\text{Cu}^{2+}$ ions

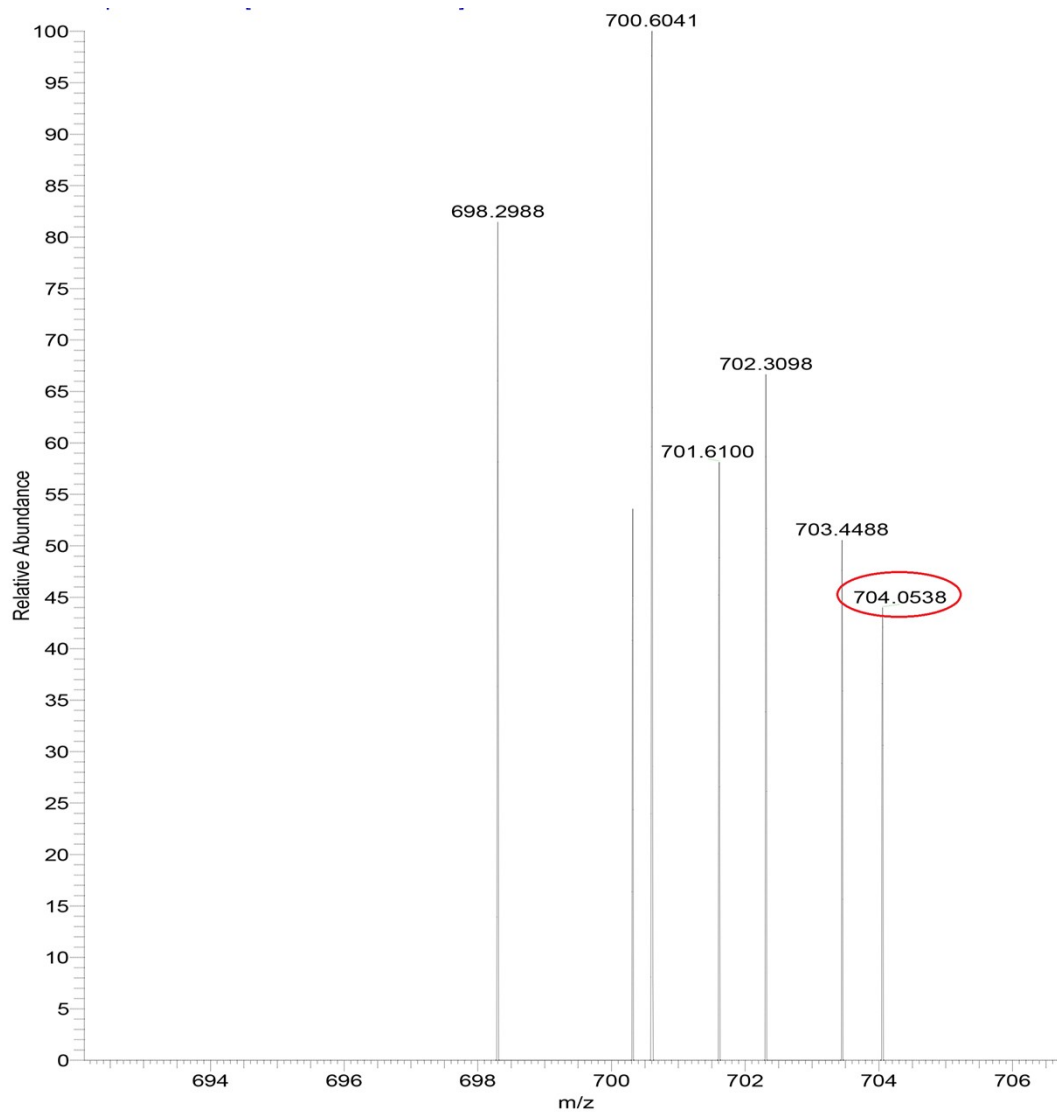

**Fig. S11** ESI/MS of sensor **DH** and after adding  $\text{Cu}^{2+}$ .

## 12.ESI/MS of $\text{DH-Cu}^{2+}$ after adding $\text{CN}^-$

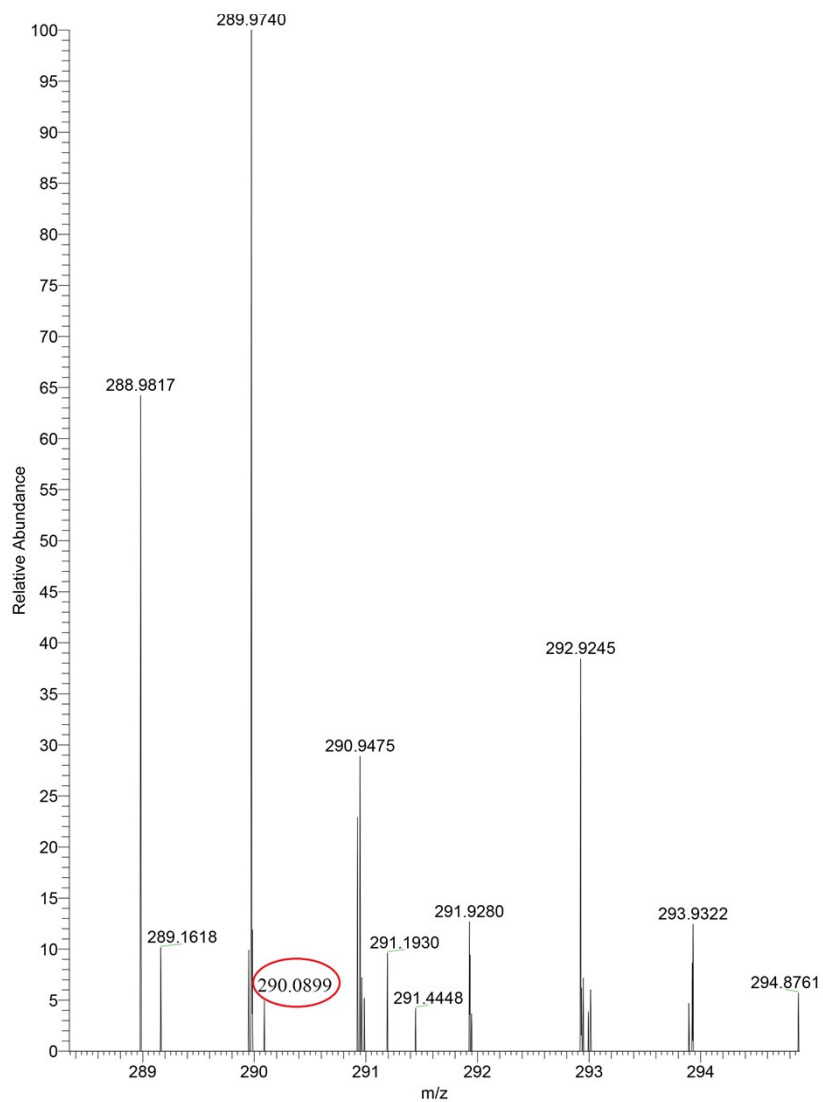

**Fig. S12** ESI/MS of  $\text{DH-Cu}^{2+}$  after adding  $\text{CN}^-$ .

### 13. $^1\text{H}$ -NMR spectrum of **DH**

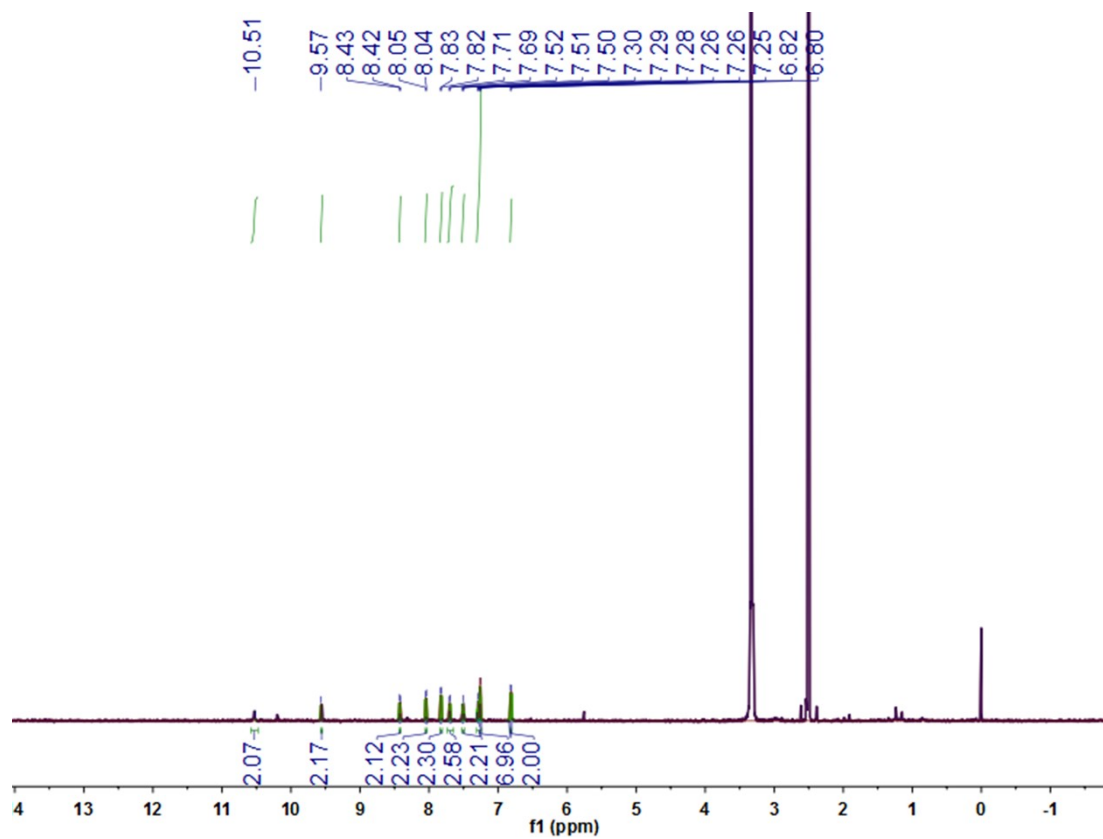

Fig. S13  $^1\text{H}$ -NMR spectrum of **DH** in  $\text{DMSO}-d_6$ .

14. The simulated absorption spectrum of the probe molecules **DH** and **DH-Cu<sup>2+</sup>** and the absorption spectrum obtained from experiments

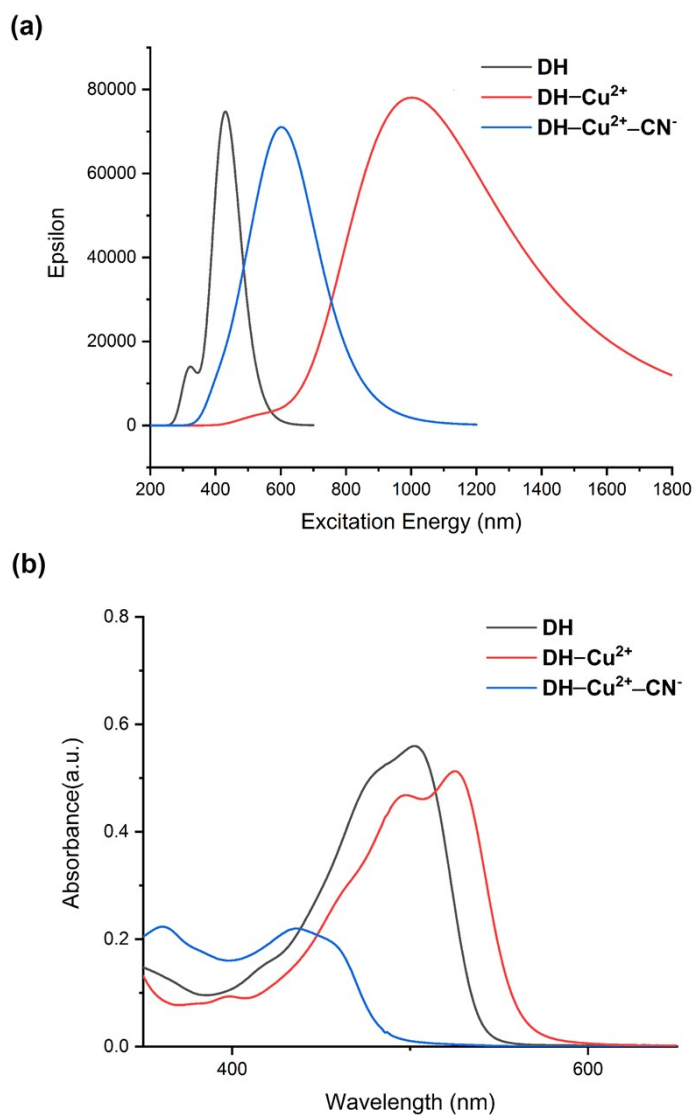

Fig. S14 The simulated absorption spectrum of the probe molecules **DH** and **DH- Cu<sup>2+</sup>** and the absorption spectrum obtained from experiments.



15. The simulated emission spectrum of the probe molecules **DH**, **DH-Cu<sup>2+</sup>**, **DH-Cu<sup>2+</sup>-CN<sup>-</sup>** and the emission spectrum obtained from experiments

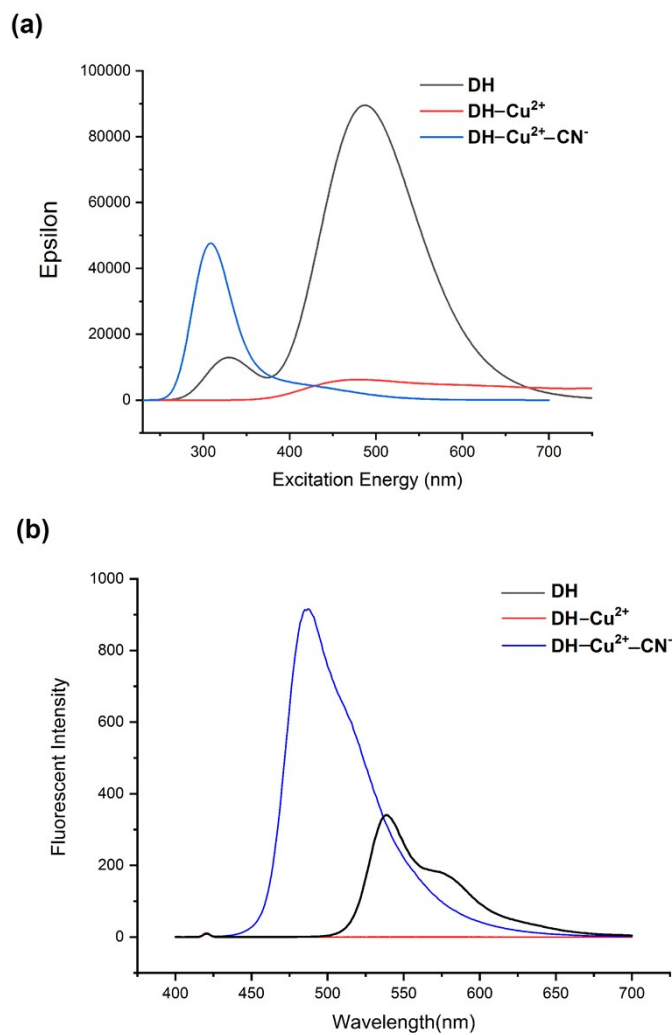

Fig. S15 the simulated emission spectrum of the probe molecules **DH**, **DH-Cu<sup>2+</sup>**, **DH-Cu<sup>2+</sup>-CN<sup>-</sup>** and the emission spectrum obtained from experiments.

16. Reversible switching cycles of fluorescence intensity by alternate addition of

$\text{Cu}^{2+}$  and EDTA

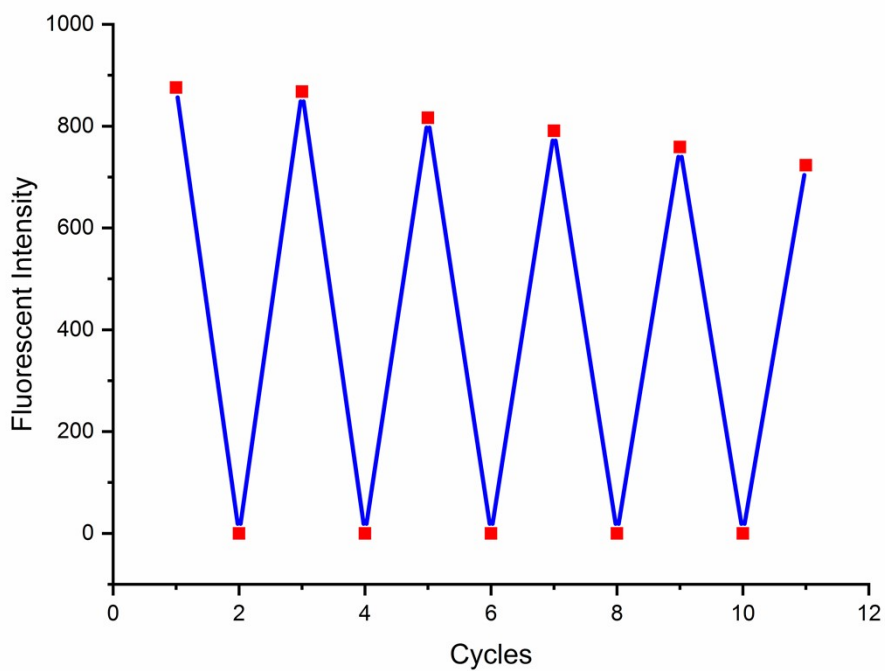

Fig. S16 Reversible switching cycles of fluorescence intensity by alternate addition of  $\text{Cu}^{2+}$  and EDTA in DMSO/ $\text{H}_2\text{O}$  (9:1, v/v) solution ( $\lambda_{\text{ex}} = 515 \text{ nm}$ ).

### 17. Cytotoxicity test of sensor DH

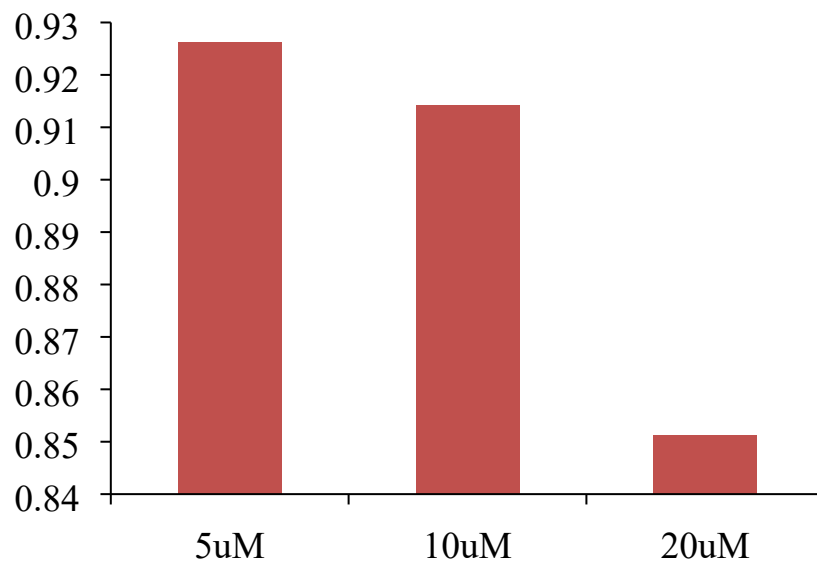

**Fig. S17** Cytotoxicity test of sensor DH.
